# Supplementary material for: Correction: Predictive modeling for odor character of a chemical using machine learning combined with natural language processing
Source: PLoS One. 2018 Dec 5;13(12):e0208962. doi: 10.1371/journal.pone.0208962 (PMC6281253; doi:10.1371/journal.pone.0208962)
Supplement: S2 Table — S2 data set is different from original source. (CSV) [file pone.0208962.s001.csv]

CAS Number	Applicable descriptor Number (from S1 Table)
50215	129
50691	99
50704	134
50817	69
51672	111
52904	133
56406	134
56417	134
56815	54
56848	99
56859	93
56860	10
56871	99
57067	101
57103	54	55
57114	99
57556	99
58082	99
59518	133
60015	28	49	55
60128	73	123
60184	99
60333	55
61905	99
63912	54
64186	143
64197	129
65850	11
66251	55	69
67470	23	28	97
67630	23
67641	7	53
67685	23	133
69727	111
71238	2	7	52	97
71363	13	141
71410	134	141
72184	54
73325	54
74793	54
75070	45	53	149
75081	3
75183	69	133
75332	89	133
75503	57	89	100
76222	94
76493	134	150
76506	26
77532	150
77747	61	69
77838	132	134
77907	72	134	149
77929	83
77930	115	134	149
78364	13
78591	16	69	142	150
78693	84
78706	59	83	102	134
78819	57
78831	61	148	149
78842	13
78933	53
78966	57
78988	28
79209	53	134
79312	1	23	119
79425	89
79776	4	11	16	66	69
80262	39	72	131
80591	11	131
80626	61
81141	150
83341	55	78
84662	54
85916	18	66	102
87194	104
87207	59	66	69	128	134
87229	11	30	75	123
87252	18	66	134
87412	44
87445	131	150
87912	61	149
87990	54
88095	16	28	129
88153	133
88697	90
89656	99
89747	59	134	150
89781	26	94	150
89792	94
89827	38	61	86	94	131
89838	45	61	94	127	150
89861	111
90028	4	131
90051	90	127	150
90120	52
90437	99
90879	52	131	145
91101	89	127
91167	49	141
91225	97
91601	133
91623	82
91645	131
92488	5	44	49	72
92524	64	69
93049	59	132	134
93083	16	18	44	66
93152	5	8	13	37
93163	131
93185	66
93287	11	42	61	134
93298	30	123	131
93516	30	34	37	42
93538	59
93549	11	59	134
93550	36
93583	61
93607	72	137
93890	5	13	16	36	66
93925	7	8	62	69
94133	22
94268	26
94304	5	61
94462	134
94473	73	123
94622	55	109
94860	28	49	90	98
95169	133
95216	4	97	141
95487	90	97
95658	22
95874	90	134
96048	7	16	23	34	100
96093	54
96173	37	45
96220	53
96480	28
96548	72	127	150
97416	53	72	134	149
97427	69	94
97450	94	134
97530	38	42	131
97541	42	131	134	150
97610	34	129
97621	39	132
97643	23	61
97858	53	66
97870	7	13
97892	61	123
97994	142
98000	22	45	100	148
98011	4	134	150
98022	28	37	45	57
98544	82
98555	84
98851	75
98862	4	70
98895	55	61
99489	72	94
99763	99
99832	72	94
99854	39	72
99865	16	69	83	90
99876	39
100061	23	28	61	98	134
100094	55
100425	90	114
100516	16	36	39	67
100527	4	36	134
100538	89
100663	2	23	34	53
100685	133
101393	38	72	131	134
101417	73	78	134
101848	64	69
101859	2	78
101860	78	85	134
101940	75
101973	5	7	8	36
102012	54
102045	114	126
102136	37	73	97	131
102169	59	73	134
102170	5
102192	73	123
102205	8	75	123	134
102227	73	123
102761	41
103093	52
103231	54
103264	132
103286	59	61	72
103366	38	115	131	134
103377	8	16	23	34
103388	7	72	113
103413	8	36	37	59
103457	39	66	69	73	91
103480	61	123
103504	4	37	61	131
103526	59	66	132	134
103537	134
103548	12	59	134
103582	11	61	134
103593	11	61	134
103606	73	123
103822	34	37	69	73
103957	59	142
104201	36	59	120	134
104212	4	36	47	49
104450	5	72
104507	44	49	72
104530	4	36	37
104541	11	75	134
104552	38	42	131
104574	4	8	59	113
104610	5	44	55	72
104610	5	44	55	72
104621	69	72	123
104654	11	69
104676	52	97	106	134
104767	100	123	134
104870	36
104905	122
104938	26	32	134
105135	28	37	61	75
105215	28	44	72
105373	53	113	134	149
105431	16	49	72
105533	61
105544	13	53	113
105577	59	69	73	136
105602	54
105668	7	49	53	73	147	149
105679	22
105680	7	8	13	39	108
105793	7	37	69	113
105851	8	73	106	115	123
105862	61	69	123	134
105873	61	80	123	134
105908	61	123	134
105953	97	134
106025	16
106183	100
106218	123	134
106229	64	123
106230	36	69	83	123	134
106241	7	8	16	123	134
106252	39
106274	8	13	113
106296	7	8	134
106309	16	91	106	113
106310	23
106321	8	13	59	108
106332	59	61	69
106354	53	55	61	69	134
106365	61	100	149
106445	90
106650	61	149
106683	13	16	23	34	69
106707	53	113
106729	27	50	67
106730	16	69
107039	133	142
107313	115
107357	99
107755	85	134
107857	141
107868	36
107879	2	7	13	34
107926	34
107959	61	134
108101	53	61	131
108214	13	53	61	134
108225	16
108292	5	72
108394	53	90	150
108463	70
108485	45	69	98
108509	45	89	98
108645	7
108838	53	61	141
108941	94
108952	6
108985	133
109057	57
109080	37	69	89	98
109159	49	52	69	128	150
109193	7	53	106
109206	7	16	69	72	91
109217	7	13	16	106	108
109422	23	149
109524	52	55
109604	33	108
109739	57	89
109795	133
109808	89
109944	53	61	134	149
109977	53	98	134
110156	1	129
110178	129
110190	7	13	53	108
110270	34	36	38	147
110383	66	100	108	149
110394	39	61	69	97	102
110407	91	118	149
110429	61	100	149
110430	13	38	131
110441	99
110452	115
110587	57
110623	61	98	141	150
110667	3
110747	16	53	69	134
110816	133
110861	57	129
110894	55	59	134
110930	69	100
111115	39	61	69
111126	69	142	144
111137	52	59	61	69	72
111148	34
111273	69	72	134	150
111308	90	117
111615	147
111626	147
111660	26
111706	7	8	44	69
111717	55	61	98	100	150
111795	69	144
111808	106	144
111819	13	39	52	73	100
111820	44	49	55	128
111875	39	55	147	150
111900	54
112050	35	135	147
112061	8	39	100	108	150
112129	39	76
112141	61	72	78	91
112174	102	113	123
112232	7	55	115
112301	55	61	123	147
112312	39	59	134
112323	61	102	123
112378	100
112389	128	134	147	150
112390	100
112425	66	69	83	86	134
112447	55	102	123	147
112458	39	55	123	134	147
112538	44	52	55	73	128
112549	59	72	134	147
112618	100
112663	39	123
112801	55
115184	52	72	100
115957	59	61	108	134
115991	39	69	150
116267	72
116530	7	8	34	37
118558	134
118581	59	134
118605	104
118616	59	61	94	134
118718	28	77	134
118729	133
118934	70	72	134
119368	15	94	131	134
119619	8	106
119846	4	44	49	72
120149	28	36	49	150
120456	62	69	97
120503	37	123
120514	4	34	36	59
120570	4	5	11	16	36
120729	23	34	37	55	57
120923	94
121324	134	141
121335	28	37	134	141
121346	37	49	66	98
121391	28	132
121448	57
121799	99
121982	5	37	49	91
122009	61	70
122032	100	150
122407	78	85	134
122430	73	123
122485	42	49	55	131	134
122576	4	5	11	23
122634	7	13	16	77	78
122678	106	134
122690	4	11	16	30
122703	123	134
122725	59	61	131	134
122781	7	8	16	36
122849	28	49	141
122918	59	134
122974	11	75	134
123079	2	90
123080	134
123115	4	5	16	36
123159	52	53	61
123193	7	13	34	107
123251	7	8	37	48
123295	61	98	100
123320	89	90	98	150
123353	5	66	69	142
123386	4	7	13	34
123513	100	148
123660	7	13	113	149
123682	113	134
123728	7	37	49	69
123751	55
123762	149
123864	13	69	134
123922	13	108	134
123966	52	72	100	131	150
124049	99
124061	44	128
124072	34	100
124107	55	73
124130	39	55	61	73
124196	7	44	55	57	66
124765	141	150
125122	134
126147	99
127173	28	45	49	69
127413	16	36	120	150
128370	26
131113	53
133379	92
134203	37	45	66	67
134963	37	66	127	150
135024	4	11	70	131
136607	61
137008	89	98
137064	89	133
137326	101
138863	39
139457	100
140103	38	59	73	131	134
140114	7	8	36	78	115
140261	61	123
140396	5
140670	2	69	94	134	141
140885	61
141059	13	39
141128	7	8	18	37
141140	61	123
141162	61	73
141786	5	53	113
141797	141	142
141979	53	61
142198	8	13	16	113
142609	147
142621	34	55	129
142836	39	59	69
142916	100
142927	7	13	36	59	108
143077	55
143088	39	123
143135	61	62	128
144398	72	108	134
147853	99
149575	50
150301	134
150607	52	69	127
150787	55	56
150845	83	123
151053	59	61	108
151100	44	52	71
288471	98
290379	71	117
302727	134
326614	36	132
334485	39	55
350038	98	134
352932	133
432257	61	69	94
443798	99
459803	83	123	149	150
464493	53	94	146
470677	131	141
470826	61	72	94	150
472662	14
488108	61	78
491350	54
494906	94	97
495409	36	141
497030	61	69
498000	5
498022	141
498602	133
499752	26	131	150
501520	123	134
502476	35	55	127
503742	34	55
505102	52	69	89	133
505293	57	133
505328	37
505793	69	133
507095	3
513440	133
513860	23	49
516063	54
527606	45
529204	36
531599	11
534156	69
534225	53
536607	59
536787	28	45	69	89
537984	54
539822	7
539888	7	53	69	113
539902	53	61	113
540078	113
540421	13	59	134
541311	133
541582	45	89
542552	53	61	134
542858	63
543497	52	100
544401	69	133
544638	100	128	147
547637	49	59	61	134
551086	72
551939	66
554121	7	13	132
556241	7
556616	117
556821	61	69
557006	7	19	53	108
557482	69	142	144	147
562743	37	67	83	86
564205	105
576261	90
577162	4	36
578585	52	59	145
579077	23	69	90	142
583608	110
586389	99
586629	114
589355	37	69	149
589388	52	53	66	149
589593	7	53	120	149
589822	13	23	45	69	89
589924	97
589980	72	91	97	100
590012	13	53
590863	61	106	129
591128	98	100
591242	90	94
591311	5
591684	7	53	120
591800	23	34	61
592847	115	149
592881	69	74	133
593088	72	131
598754	61
600146	4	23	28	34
600180	28	49
606451	72	75
611132	16	61	96	134
613707	97	145	150
614993	59	115
616251	23	69	74
617356	12	69	142
620020	4	28	131	134
620791	11	61	78
622399	59	69	94
622457	55	61	97	134
622786	25
623052	134
623176	13
623198	59	131
623212	66
623303	98	131	150
623369	61	69
623370	2	53	90
623427	7	53
623701	28	53	117	124
624099	61	68	69
624248	61	98
624419	13	107
624920	69
625332	61
625605	45	133
626675	54
626777	34	149
626824	61	149
626937	149
627907	44
628637	13	52	53
628977	147
628999	55	69	91
629196	52	69	133
629334	53	61	69
635461	40
637649	73	88
637650	144
638028	133
638119	49	69	113	147
638255	134	149
638493	52	53	61
638539	150
644086	37	56	94	131
644359	90
644495	113
645567	90
646071	34
659701	7	8	87	134
689678	7	69	142	150
692864	55	61	97	147
693549	102
693958	69	98
695067	72	134
698102	28	88
698271	4
698760	23	44
705862	8	23	44	49
706149	106
710043	23	44	147
713951	23	34	44	49
763326	61
765708	28	45	88	98	127
821410	69
821556	34	44	55	57	100
823223	134
825514	59
828262	16	39	52	94	133
868575	7	134
881685	11	59
882337	52	133
925780	34	61	69
927491	99
928803	55	59	69	102
928927	138
928949	2	4	7	69
928950	7	13	55	69	102
928961	69
928972	69
932161	52
1002842	147
1003049	23	89	133
1072839	145
1076568	37	45	69	97
1117551	69	142
1118270	7	125	134
1119444	44	49	68	69
1120214	54
1122629	55	100	137
1123859	75
1124114	37	45	55	97
1125219	97	134	150
1125888	59	98
1128081	59	61	69
1139306	150
1153511	54
1184787	57
1188029	23	34	49
1191088	89
1191168	7	69	80
1191431	55	89
1192627	4	14	28	45
1193186	28	36	90	98
1193799	98
1195320	42
1197019	145
1205170	59	72
1222055	53
1438911	45
1438944	52	69	142
1504741	59	131	134
1551446	7	113
1569604	46
1575742	34
1576870	7	69	102	142
1576950	53
1577180	34
1618264	34	52	74	131
1629589	69
1632731	52
1653301	61
1679078	69	89	133
1708812	69
1731846	44	98	149
1754627	11	61	132
1759280	37	98
1797746	73	134
1866315	11	106
1878188	133
2021285	53	61	149
2035996	7	44	69	147
2050013	8	73
2051787	8	106
2052144	43
2052155	61
2084186	133
2153288	7
2179579	69	133
2179604	133
2216515	26	94	137
2217336	34	113
2244168	29
2277192	39	91
2294760	69	91	142
2305057	55	61	106	108
2305251	39	66	127
2306889	44	61	100	134
2345280	33
2349077	66	149
2396783	113
2396830	113
2396841	53	61
2412808	113	134
2432511	34	55	69	97
2445763	7	8	34	49	55
2445774	7	55	72	94	147
2445785	7	59
2497189	7	13	66	69	106	108	113	147
2497214	53
2530101	89
2548870	69	131
2568254	17
2639636	8	113	134
2705875	12	113	134	147
2721224	49	147
2756561	59	72	141
2758181	134
2785877	5	8	42	57	89
2785899	82	90	127	131
2835394	7	36	149
2847305	4
3025307	7	55	69	149
3142721	132
3149288	37	98
3188009	23
3208160	45	53	134
3249681	16	69	95
3268493	14	34	49	57	69
3268493	14	34	49	57	69
3301948	8	23	89	98	134
3387415	131	150
3391864	34	49	57	69	89
3452979	72	100
3460444	52	61
3489289	89	133
3549233	49	69	75	78
3572063	16
3581917	89	98
3615416	54
3658773	132	134
3658808	89	133
3681718	13	69	142
3777693	69	142
3848246	23	49	100	134
3913813	55	69	89	100	102
3943746	141
4077478	28	45	66	88
4112894	89	127
4208495	28	61
4230971	13	23	55	113
4253898	89	133
4312996	50	69	96
4313035	38	55	71
4313579	54
4404459	69
4410995	26
4411896	37	52	59
4437201	89
4437518	28	45	49
4455134	8	45	53	69
4532643	133
4536236	79
4602840	5	8	11	42	67
4630073	67
4630824	16	49
4707475	95
4748781	4	134
4798441	13	53	149
4861852	53	73	123	149
4864613	7	59	61	72
4938527	138
5271385	89
5292217	78
5328370	150
5349622	131	134	150
5392405	83
5405414	66	134
5418860	133
5435643	52
5454091	39	55	147
5454193	53	61	149
5457705	59	61	69
5471512	120	134
5579782	23
5655618	112
5794036	141
5837785	28	61	120
5870939	69	134
5910872	55	57	69	89	91
5910894	4	45	69	89
5989275	83	102	134
5989548	26	72	94
6032297	69	100
6222351	13	113	134
6259763	69
6290375	13	69	123
6309519	15	20	49	66	147
6378650	61	69
6485401	72	130
6627889	89
6728263	4	7	69	142
6728310	23	57	69	94
6738234	131
6789806	7	66	69	84	102
6789884	11	69	150
6911519	52
6915157	54
6963560	5	115	134
7212444	7	39	69	123	150
7217596	28	45	127
7251618	22
7367819	61	69
7367886	55	147
7416355	39
7452791	7	69	115
7492662	39	69	100
7492708	23	34	44	49
7493574	53	69	81
7493632	69
7493745	73	113	134
7549339	59	61	141
7647010	54
7756969	115	134
7764503	72	94
7779659	37
7779784	59	69	72	97
7780065	11	61
7785264	150
7785708	112
7786585	73	123
7786610	7	107	131	149
7787204	134	141
7789926	54
10031820	131	134
10031875	8	13	39	97	100
10031900	69	113
10032027	61	72	123
10032130	7
10032152	61	69
10094345	72	115
10340235	91
10415879	59
10482561	84
10486198	67
10519332	39	55	69	78	89
10521912	30	90
10599709	89	98
13327565	39	113
13419697	55	97	134
13466789	83
13481873	91
13532188	61	133
13623115	37	45	71
13678609	16
13678676	34	45	69	89	98
13678687	133
13679613	49	133
13679704	36
13679851	12	23
13708128	45	98
13851111	134
13925003	23	97	98	150
13925069	69
13991372	55
14073973	16	26	72
14309570	16	96	131
14371109	38	42	131	134
14436329	128
14667551	37	71
15679126	69	98
15679137	52	69	89	98
15679193	89	98
15706737	7	37	113	134
15707230	52	71	116
15707241	52	71	89
15764166	4	36	131	134
16409431	52	64	69	73
16409453	16	91	100	102	150
16409464	61	134	150
16491364	23	69	149
16491546	23	55	57	69	97
16630527	116
16630663	122
16957703	61
17283817	150
17369594	59	72	131	150
17587336	69	142
18031408	36	69	100
18138039	69	98
18138040	71	89	142
18172673	150
18277275	37	69	97	98
18402829	16	23	69	83	131
18409171	61	69	89	142
18457551	55	69
18479577	86
18479588	86
18486696	16	73	86	94	150
18640749	69	72
18829555	7	55	69	83
18829566	55	147
19089920	113
19317114	94
19788499	66	69	89	133
20407845	55	72	102
20582858	25	133
20662844	14	37
20665854	4	36	37	49
20777495	90	94	141
21145777	53
21188589	53	61	100	149
21662099	102
21834924	37
22047252	37	69	98
23495127	80
23696857	7	39	98	127	150
23747480	52	107
23787806	122
24168705	69	109	142
24295032	37	61	71	89
24680500	38	49	72
24683009	69	109	142
24817514	59	61
24851987	78	134
25152845	39	55	89
25152856	69	150
25395317	53
25680584	116
25773404	52	69	97	98	109
26643914	37
27593233	4	44	96	134
27625350	61
28069729	69	91	142	144
28069741	69	96	97	142
28588741	23	44	45	89
28664359	28	33	69	88
29926418	98
30361296	23	131
31501118	7	69	142
31502144	55	69	91	134	147
32210234	49	134	150
32263006	98
32974928	69	89	98	100
33467731	69	142
33467742	7
34300942	134
34413359	34
35154451	7	69
35158259	16
35243437	116
35852461	61	69	142
35854865	69	91
36653824	59	147
36701016	61	97
38205606	89	98
38462225	16	66
39212232	44	69
39255328	113
40018266	89	133
41453569	91	147
41519237	7	53	94	98	102
42436077	72	95	134	150
51755852	133
53398837	7	34	69	89
53398859	7	72	94	147
53448070	61	72	102
54300082	28	71
54410832	69	81
54947749	34	69	89	95	97
55719852	69	120	123	132
57074370	61
57500002	28	45	57	89
59020858	45	133
61692840	72
61931815	61	69
64275736	55	69
65405778	11	69
65405803	69
65813538	59	61
66576714	53	69	100	113
67715804	69	139
68555657	7	69	100
72987623	122
73545150	61
94278270	45	55	89
